# Supplementary material
Source: PubMed Central journal article supplement (PMC4572571)
Supplement: mmc1.pdf [file mmc1.pdf]

**Biophysical Journal**

**Supporting Material**

**Cell-Size Homeostasis and the Incremental Rule in a Bacterial Pathogen**

Maxime Deforet,<sup>1</sup> Dave van Ditmarsch,<sup>1</sup> and João B. Xavier<sup>1,\*</sup>

<sup>1</sup>Program in Computational Biology, Memorial Sloan-Kettering Cancer Center, New York, New York

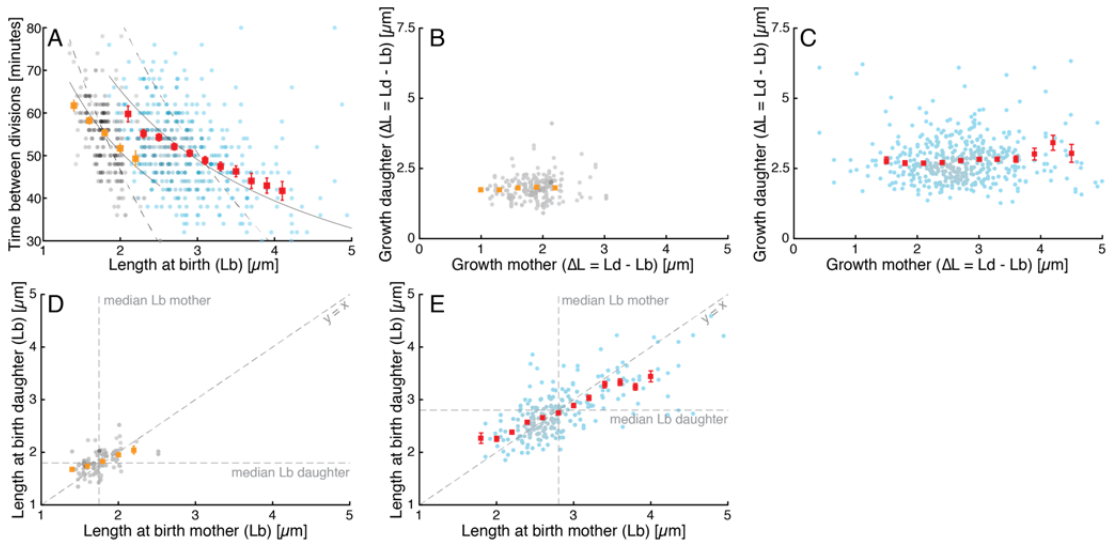

**Figure S1: *P. aeruginosa* and the *frik* mutant obey the incremental rule of cell size regulation.** For all plots, wt is plotted in black and orange, whereas *frik* is plotted in cyan and red. (A) There is a negative correlation between Lb and  $\Delta T$ . Solid lines indicate best fits to the incremental model and dash lines indicate best fit to the “sizer” model. (C-D) There is no correlation between  $\Delta_{\text{mother}}$  and  $\Delta_{\text{daughter}}$ . (E-F)  $L_{b,\text{mother}}$  and  $L_{b,\text{daughter}}$  are correlated with a slope of 0.5.

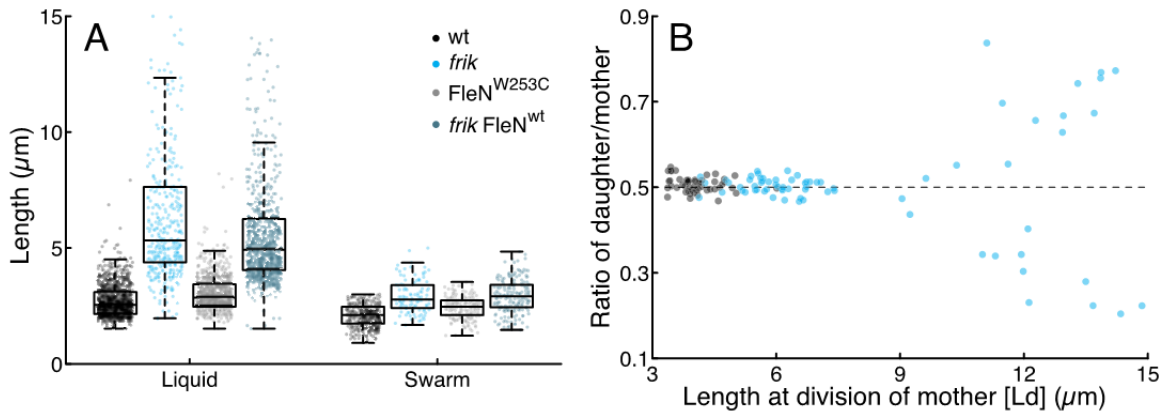

**Figure S2: Cell size in *Pseudomonas aeruginosa* and its elongated mutant *frik*.** (A) Cell length distributions from exponentially growing liquid cultures and swarms. In liquid culture, *frik* and *frik*  $\text{FleN}^{\text{wt}}$  are longer than wt and  $\text{FleN}^{\text{W253C}}$  ( $N = 423\text{-}897$ ,  $p < 0.001$  by Kruskal-Wallis). *Frik* and *frik*  $\text{FleN}^{\text{wt}}$  are longer than the other two strains when quantifying at swarming edges, as determined by Kruskal-Wallis test ( $p < 0.001$ ,  $n = 107\text{-}376$ ). (B) Cell division is very symmetric for both wild type (black) and *frik* cells (cyan), with the exception of the filamentous cell ( $>10 \mu\text{m}$ ).

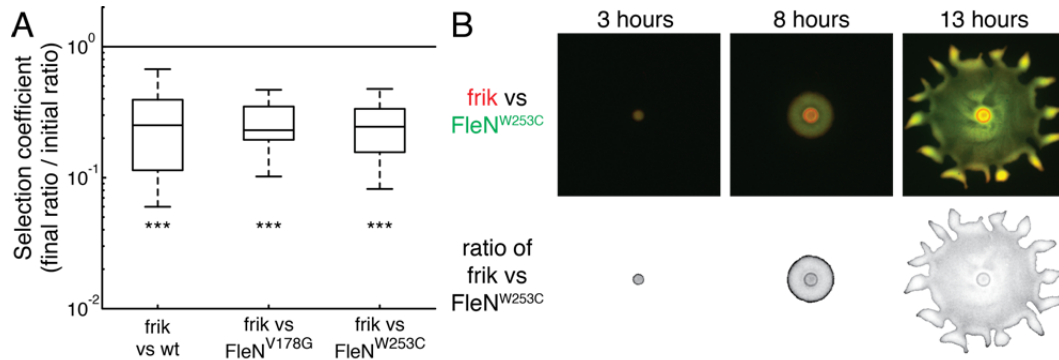

**Figure S3: *frik* has a swarming advantage over wild type and other hyperswarmers.** (A) Selection coefficients (defined as final ratio over initial ratio) of various clones against *frik*. The horizontal line represents the neutral selection coefficient of 1; anything below that means that the respective clone loses against *frik*. The (inverse) selection coefficient of *frik* versus wt was previously published [21]. (B) *Frik* segregates at the edge of a swarm from early on. The top row represents fluorescence images and the bottom row is the calculated ratio of *frik* versus FleN<sup>W253C</sup> based on the fluorescence channels.

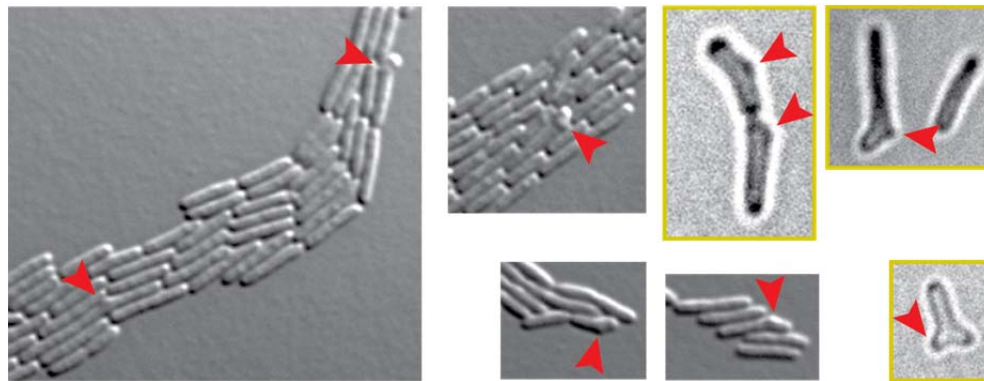

**Figure S4: *frik* occasionally shows membrane instabilities.** Microscopy pictures taken from either agar pad or liquid culture cells (the latter are outlined in dark yellow) for *frik* shows various cells with membrane instabilities (indicated with red arrowheads).

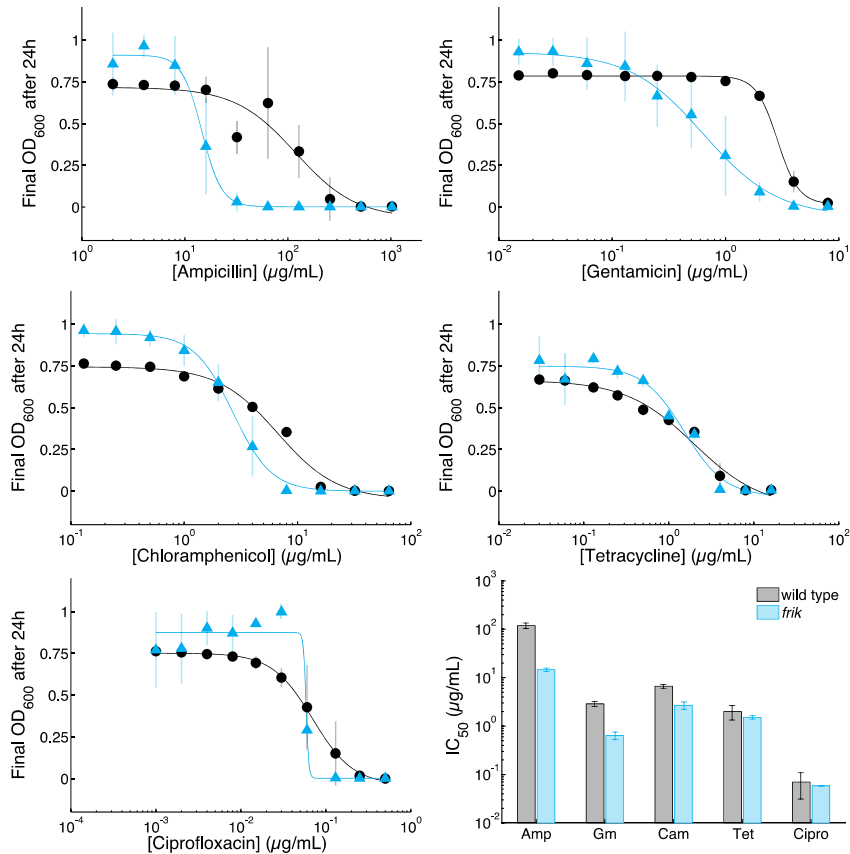

**Figure S5: *frik* is sensitive to ampicillin, gentamicin, and chloramphenicol, but not tetracycline, or ciprofloxacin.** Minimal inhibitory concentration (MIC) measurements for (A) ampicillin, (B) gentamicin, (C) chloramphenicol, (D) tetracycline, and (E) ciprofloxacin. Black circles represent wild type, cyan triangles represent *frik*. Mean and standard deviation are plotted. The lines indicate the model fit with which the IC<sub>50</sub> was determined. (F) The determined IC<sub>50</sub> values for the various antibiotics with 95%-CI.

wt PA14\_65570 amino acid sequence

```
MTRPTSVPKDNFFLLFRALRQRRVPIALRLASHSLILVALALLIYAWVMGMQFRQAMQQADALGQSLITQTAASATELLVSNLILSLNVLNLLVKNPLVAHAAIYSIDQRIILAEAGSRPKI
ATEGLYSTPITFQVIAGHLRISLDMQFQPMHISLQSMGLISLILITIALYFSLRLGRQISTPLLQLRVWLRDPNDNPAPGAELQNELGDLARDLEERLVPEKPPAPEEAPLPQNFDDILI
ADLRSRKVEASAFEEDIPLGDALLDETKPVEFTSIDEDPLDQDAFDENGAEAGDQPAAPAAAREPQHSAVLAIQLGAQEQLRRLPRSRLVDLLQRYRDCLEQAARQYKGSLHTLSDGGSLLILI
NRADYLTNALCCGELMRALGHALQIEVADSGITLQLQLGLSLGEDLSEQTADLLNETVQNALALNQHSRNLLLVERSIADDAVVRERARIRAIASPEGACCVVERLLEPYPSMLERQLARMHI
```

**Figure S6: *frik* mutants have a mutation in a putative transmembrane domain in gene PA14\_65570.** The amino acid sequence encoded by gene PA14\_65570 has two predicted transmembrane domains (in red). The 9 base pair deletion found in the *frik* mutant would cause the loss of 3 amino acid residues in one of the transmembrane domains (shown in a rectangle).
